# Supplementary material
Source: publisher figshare collection journal article supplement (https://gsapubs.figshare.com/ndownloader/files/40576793)
Supplement: Supplementary file 1 [file 40576793]

## Sheet: Major and Trace elements
Table S2: Major-element (wt%) and trace-element (ppm) data of the late Mesoproterozoic mafic rocks from the southwestern Yangtze Block
	YB1304	YB1305	YB1306	YB1310	YB1311	YB1312		LNP1202	LNP1203		TA1423	14TA23	14TA24		Yjmqz-01-1	Yjmqz-01-2	Yjmqz-01-3	Yjabd-09-1	Yjabd-09-2	Yjabd-09-3	Yjabd-09-4	Yjabd-10-1	Yjabd-10-2		03KD516	03KD518	03KD520	03KD521	03KD523	03KD527	03KD528		CK04-01	CK04-03	CK04-05	CK04-07	CK04-09	CK24-11	CK24-12	CK24-16	CK24-18	CK24-20		YM92	YM93	YM202	YM203	YM206	YM208
	1.15 Ga Dongchuan dolerites							1.07 Ga Lanniping gabbros			1.06 Ga Tong'an dikes				1.17 Ga Cuoke plagioclase amphibolites										1.14 Ga Laowushan basalts								1.14 Ga Cuoke dolerites											1.05 Ga Julin basalts
	This study							This study			This study				Liu et al., 2021										Greentree et al., 2006								Chen et al., 2021											Chen et al., 2014
SiO2	46.1	45.3	46.3	47.5	46.9	46.8		44.97	43.38		47.7	44.22	44.15		44.27	46.64	44.45	41.19	42.47	40.91	46.01	48.43	46.78		58.22	54.83	48.08	54.4	56.22	55.7	51.4		45.43	45.6	43.03	44.2	43.11	47.06	47.85	48.12	47.67	47.13		49.2	49.79	48.74	50.17	44.26	49.58
TiO2	2.43	2.64	2.86	2.6	2.7	2.62		4.29	5.33		1.85	0.86	0.9		2.39	3.41	2.25	1.09	1.12	1.2	4.24	3.07	1.62		2.15	2.06	2.78	2.78	1.97	2.23	2.89		2.93	2.87	2.76	2.93	2.69	2.22	2.23	2.19	2.22	2.18		1.61	1.5	1.62	1.1	2.72	2.22
Al2O3	14.45	14	13.75	13.45	13.55	13.55		14.33	12.2		14.35	16.73	16.77		15.52	14.03	16.92	13.93	10.04	12.95	13.02	14.29	14.61		20.12	14.24	15.7	15.91	11.03	14.26	18.61		14.74	14.98	15.45	15.77	15.76	17.51	17.68	17.53	17.67	17.45		14.76	14.42	15.03	14.65	17.83	15.86
Fe2O3T	15.64	17.32	16.79	15.96	17.38	16.2		16.39	17.64		9.6	9.35	9.99		17.01	17.83	16.55	16.16	16.77	16.74	17.9	15.18	12.75		10.7245	10.9468	10.1799	13.7807	13.5362	16.259	18.6261		18.35	17.59	19.7	18.68	19.49	15.15	13.93	14.21	14.06	14.65		12.8	12.26	13.48	13.4	20.22	13.53
MnO	0.15	0.1	0.16	0.15	0.14	0.17		0.16	0.18		0.21	0.33	0.32		0.27	0.26	0.23	0.21	0.24	0.24	0.27	0.23	0.23		0.02	0.06	0.18	0.06	0.09	0.07	0.03		0.26	0.26	0.26	0.26	0.26	0.21	0.19	0.2	0.2	0.22		0.21	0.2	0.22	0.22	0.26	0.27
MgO	6.15	7.4	6.45	6.07	5.87	5.99		5.58	4.95		7.26	10.33	10.94		6.56	4.62	6.12	14.3	16.35	14.71	5.25	5.19	9.22		3.47	4.42	3.53	4.42	3.32	7	4.09		6.74	6.65	7.46	6.53	7.19	5.35	6.12	6.03	6.11	5.13		7.04	7.18	7.5	7.27	7.85	6.69
CaO	5.55	3.56	5.56	6.85	5.66	7.56		5.52	8.11		13	11.91	10.3		8.62	7.41	8.12	7.11	7.14	8.02	8.71	7.45	8.42		0.48	9.38	14.58	5.1	10.55	2.33	0.15		7.81	8.18	8.06	7.96	8.21	7.89	7.13	6.82	7.2	8.78		9.49	9.38	9.79	9.6	2.79	8.46
Na2O	3.71	2.61	3.51	3.44	3.84	3.25		3.07	3.22		2.71	2.4	2.88		1.97	3.58	2.68	0.87	0.22	0.6	2.62	3.98	2.64		1.52	2.3	0.64	0.45	0.87	0.03	0.04		2.93	3.06	2.34	2.79	2.53	3.44	4.06	4.02	4.07	3.5		2.26	2.64	2.03	1.62	0.83	1.81
K2O	1.97	3	1.95	1.58	1.41	1.59		2.07	1.06		0.31	0.42	0.45		0.43	0.34	0.4	0.17	0.03	0.17	0.26	0.29	0.58		4.01	2.36	4.85	4.28	3.14	3.62	5.88		0.54	0.61	0.74	0.66	0.58	0.93	0.57	0.65	0.57	0.74		2.48	2.46	1.41	1.87	2.85	1.29
P2O5	0.2	0.14	0.18	0.25	0.23	0.21		0.554	0.561		0.19	0.108	0.123		0.24	0.36	0.23	0.11	0.12	0.14	0.41	0.37	0.27		0.35	0.5	0.5	0.18	0.62	0.13	0.13		0.26	0.2	0.19	0.22	0.18	0.23	0.23	0.23	0.23	0.22		0.15	0.16	0.17	0.09	0.37	0.29
L.O.I.	2.66	2.63	2.16	1.73	1.71	2.08		2.47	2.91		2.43	2.47	2.38		2.36	0.94	1.92	5.04	5.68	4.54	0.7	1.08	2.98		6.16	9.1	12.62	7.37	9.32	5.5	8.41		1.82	1.52	2.23	2.1	2.05	1.69	1.64	1.9	1.66	1.17		1.24	1.62	1.9	1.92	6.22	1.91
Total	99.01	98.7	99.67	99.58	99.39	100.02		99.404	99.541		99.61	99.128	99.203		99.64	99.42	99.87	100.18	100.18	100.22	99.39	99.56	100.1		107.224	110.197	113.64	108.731	110.666	107.129	110.256		99.89	99.64	99.85	99.87	99.56	99.57	100.27	100.05	100.08	99.9		101.24	101.61	101.89	101.91	106.2	101.91
Sc	41.9	52.8	47.1	48	45.9	48.2		42.0397	54.8359		39.8135	18	17.8		36.6	41.6	29.6	15.1	19.4	18.2	50.1	42.7	33.2		15.09	14.49	20.28	18.77	11.55	14.67	13.8		37.6	42.5	36.8	37.1	34.3	35.7	36.1	35.8	36.5	34.8
V	462	531	547	511	426	440		250.647	266.942		249	119	123												247.6	148.8	210.6	84.67	125.5	104.2	99.9		386	454	419	464	406	297	307	297	306	295		223	255	193	186	163	205
Cr	59.6	79.3859	70.9286	90.4368	82.8816	83.4454		163.126	49.8661		481	378	366		172	76.4	202	117	96	92	25.4	87.3	605		105.8	111.8	104.9	90.59	44.47	85.59	60.82		141	138	189	127	180	94.3	97.7	95.8	97.3	94.4		249	247	135	204	55.2	144
Co	46.8	50.6	45.8	48.5	52.9	50.1		42.6906	45.5635		31.8	52.5	62		69.8	61.6	69.7	91.5	105	98.7	81.4	53.5	62		30.99	27.96	20.54	26.49	21.39	40.78	38.57		59.5	55.6	71.9	60.7	58.9	46.1	42.2	41.6	43	45.6		48.5	38.1	1.8	41.3	44.6	39.8
Ni	68.1	84.6	63.2	62.2	67.1	67.9		18.7959	13.1509		97.1	287	299		81.2	35.8	66.2	336	453	350	26.6	41.4	218		75.5	67.9	67.89	65.06	50.27	86.16	94.08		73.3	72.9	94	76.7	87.8	43.4	46.2	45.3	46	43.1		63.3	59.1	56.9	32.4	71.6	88.7
Cu	76.7	66	64.1	97.8	89.6	124		927.779	199.262		98.1212	87.2	81.2																				74.3	37.8	47.1	71.4	62.8	58.6	9.02	12.1	10.1	39.4
Zn	85.3	64.3	85.5	64	60.8	63.3		149.843	156.07		147	288	344																				133	143	151	142	149	100	107	107	108	104
Ga	19.8	18.9	20.4	21.2	19.6	21.3		25.4792	24.3555		14.7	14.7	14.1																				20.5	20.5	21.7	22.5	22	21.8	22.6	22.2	22.1	21.4
Rb	80.2	153	81	63.6	60	63.6		56.8232	32.3461		4.26702	15.2	11.4		14.1	10.8	13.1	4.64	0.29	5.56	3.84	7.2	21.5		77.69	45.28	113.1	83.87	54.99	91.38	105		22.6	23.8	17.2	25.2	14.4	35.3	17.4	21.9	17.6	27.9		145	161	69.5	105	150	64.7
Sr	184	126	173	209	197	230		171.78	154.576		523	421	434		222	304	222	88.9	12.5	31.8	238	200	311		36.58	23.1	4.2	3.64	69.68	49.62	4.53		240	287	268	285	265	310	214	205	213	356		201	165	180	186	119	130
Y	30.1	28.8794	34.6103	42.5886	40.2288	40.1165		51.1933	59.4181		21.7	11.2	11.9		34.8	52.2	32.8	15	17	17.8	57.7	70.2	26.2		19.38	14.74	9.42	10.86	14.5	20.59	12.87		32.5	31.5	22.9	27.1	24.4	31	31.5	31	31.4	31.4		28.9	24	28.8	29.1	29.4	38.8
Zr	150.86	114.038	145.996	189.68	181.633	173.586		266.168	272.712		108	57.8	57.5		151	230	137	57.9	77	73.7	254	171	138		311	288.1	238.8	213.9	122.8	211	298.6		151	165	91.5	105	99.9	112	106	105	106	149		80.9	38.2	46.6	32.5	118	116
Nb	12.3645	9.33289	12.4729	16.1363	16.1363	14.7407		30.2944	35.2008		17.707	8.81788	9.87301		18.6	27.5	18.3	9.05	8.55	9.43	39.1	46.6	25.6		46.27	36.61	31.12	28.03	19.75	24.74	51.08		17.8	15.1	13	14.9	13	15	15.1	14.9	15	15		9.05	11.3	6.21	3.68	15.3	12.6
Cs	3.02	8.69	3.14	2.16	2.07	1.75		1.49905	1.62703		0.212	3.94	3.84																				0.3	0.14	0.15	0.19	0.15	0.52	0.26	0.35	0.28	0.27		2.25	2.41	0.79	0.88	1.94	2.95
Ba	272	356	310	196	168	175		807.073	283.862		204	468	542		187	83.7	156	61.8	5	30.8	91.6	83.6	267		199.1	380	316.4	199.5	591.1	421.9	344.8		232	220	355	255	257	467	290	379	296	321		276	237	151	164	357	120
La	13.1	12.1	12	14.4	14.7	11.7		24.1095	24.8006		15	10.4	10.7		14.8	23.1	14.2	6.8	6.29	8.22	23.29	30.5	19		50.6	38.07	17.92	26.77	20.19	31.3	34.11		16	13.1	9.24	10.2	12.6	12.9	13.6	12.9	13.4	12.9		8.68	7.22	6.38	3.43	13.7	12.5
Ce	30.5	27.5	27.1	34	31.5	28.5		53.3277	56.2172		30	20.4	21.4		32.2	51.2	32	14.8	13.5	18.2	53	59	39.4		107.2	77.13	45.33	57.01	44.6	65.27	68.47		34.6	28.4	21.2	23	30.1	27.8	28.9	27.3	28.6	28.9		21.2	17	15.6	8.21	30.7	29.4
Pr	3.95	3.54	3.57	4.46	4.05	3.83		7.28561	7.85189		3.71	2.37	2.53		4.51	7.08	4.4	2.04	1.94	2.51	7.31	9.18	5.05		14.01	9.73	5.67	7.36	6.1	8.47	8.6		4.59	3.89	3.02	3.32	4.5	4.08	4.33	4.06	4.21	4.05		3.1	2.43	2.23	1.22	4.18	4.07
Nd	18.5	15.9	16.9	20.3	18.6	17.6		32.5669	35.0789		16.4	9.93	10.3		20.5	31.1	20	9.16	8.81	11.4	33.4	40.3	21.3		57.69	37.19	22.69	29.49	27.96	34.97	32.86		19.9	17.4	14	15.5	19.7	19.1	19.5	18.5	19.4	18.9		14.1	11.6	10.6	6.33	19.1	18.9
Sm	4.47	4.15	4.35	5.31	4.7	4.63		8.4995	9.37358		3.94	2.5	2.55		5.39	8.18	5.08	2.38	2.5	3.04	8.79	10.21	5.09		9.59	5.54	3.4	4.83	5.16	6.53	5.14		5.09	4.73	3.73	4.3	4.55	5.14	5.21	5.1	5.2	5.11		3.94	3.35	3.19	2	4.74	5.18
Eu	2.14947	1.95148	1.94549	2.00751	1.8098	1.89787		3.31468	3.2789		1.54904	1.33859	1.05665		1.85	2.74	1.91	0.85	0.76	1.06	2.77	2.51	1.89		2.95	1.26	0.92	1.53	1.73	2.11	1.38		1.62	1.39	1.32	1.45	1.41	1.83	2.31	2.03	2.27	1.81		1.48	1.36	1.23	1.01	1.34	1.85
Gd	5.33245	4.4452	5.20641	6.307	5.81942	5.46644		9.19018	10.1992		4.22293	2.34888	2.5744		5.96	9.02	5.74	2.57	2.85	3.18	9.6	11.1	4.97		6.96	3.6	1.88	3.2	4.57	5.72	3.26		5.68	5.23	4.06	4.6	4.48	5.51	5.61	5.43	5.54	5.29		4.8	4.07	4.16	3.32	5.09	6.27
Tb	0.869	0.751	0.854	1.05	0.961	0.924		1.6112	1.89081		0.741	0.327	0.394		1	1.52	0.96	0.43	0.49	0.54	1.65	1.91	0.78		1.07	0.55	0.32	0.51	0.67	0.85	0.5		0.95	0.9	0.7	0.8	0.75	0.94	0.98	0.93	1	0.95		0.81	0.67	0.69	0.61	0.8	0.94
Dy	5.26	4.67	5.25	6.51	6.12	5.92		9.45807	11.0026		4.12	2.17	2.4		6.22	9.13	5.81	2.68	2.91	3.17	9.98	11.9	4.49		5.14	3.03	1.96	2.73	3.41	4.35	2.79		5.69	5.57	4.23	4.79	4.42	5.56	5.73	5.65	5.77	5.65		4.77	4.26	4.31	4.04	4.54	5.87
Ho	1.07	0.903	1.1	1.3	1.23	1.23		2.175	2.48901		0.803	0.405	0.467		1.2	1.83	1.15	0.53	0.59	0.65	2.05	2.41	0.91		0.85	0.58	0.41	0.5	0.62	0.74	0.55		1.15	1.11	0.84	0.98	0.9	1.13	1.13	1.14	1.15	1.15		1.06	0.92	0.95	0.94	1.02	1.29
Er	3.04	2.7	3.12	3.69	3.57	3.42		5.65109	6.38729		2.27	1.09	1.25		3.49	5.24	3.29	1.51	1.66	1.86	5.82	7.04	2.52		2	1.58	1.19	1.28	1.63	1.83	1.48		3.32	3.22	2.32	2.76	2.49	3.11	3.21	3.16	3.25	3.27		2.81	2.51	2.54	2.69	2.68	3.43
Tm	0.434	0.392	0.443	0.524	0.51	0.449		0.794458	0.913509		0.298	0.149	0.155		0.51	0.75	0.48	0.22	0.24	0.26	0.82	1.08	0.33		0.24	0.2	0.17	0.17	0.23	0.22	0.2		0.47	0.45	0.33	0.4	0.36	0.45	0.45	0.45	0.48	0.47		0.41	0.36	0.33	0.38	0.37	0.45
Yb	2.59	2.35	2.76	3.27	3.25	3.09		5.08797	5.97466		1.82	0.886	0.912		3.21	4.75	3.01	1.45	1.57	1.65	5.22	6.94	2.16		1.36	1.23	1.01	1.03	1.44	1.37	1.19		3.02	2.96	2.21	2.54	2.27	2.97	3.04	2.93	3.03	3.08		2.61	2.2	2.28	2.49	2.3	2.94
Lu	0.38	0.353	0.418	0.458	0.465	0.456		0.72739	0.854495		0.289	0.135	0.145		0.48	0.7	0.47	0.22	0.23	0.27	0.81	1.06	0.33		0.19	0.18	0.15	0.15	0.22	0.2	0.18		0.47	0.45	0.32	0.38	0.35	0.45	0.44	0.43	0.45	0.48		0.4	0.34	0.35	0.36	0.34	0.43
Hf	3.33984	2.86756	3.37296	4.09809	4.02118	3.57072		7.65271	8.01958		2.8	1.44	1.44		3.72	5.82	3.66	1.49	1.98	1.9	6.28	4.62	3.4		7.83	6.57	6	4.45	3.01	5.14	6.75		3.71	4.19	2.43	2.92	2.67	3.14	2.95	2.97	2.93	3.67		2.51	1.31	1.4	1	2.76	2.6
Ta	0.624276	0.565503	0.689375	0.899419	0.883262	0.764776		1.82289	2.07197		0.931513	0.447565	0.465907		1.13	1.76	1.17	0.49	0.55	0.6	2.43	2.51	1.44		3.29	2.6	2.27	2.1	1.31	1.86	3.18		1.11	0.98	0.79	0.94	0.79	0.88	0.93	0.89	0.91	0.92		0.67	0.55	0.37	0.21	0.93	0.78
Pb	2.87	1.79	2.86	4.81	3.33	2.29		4.27492	7.23065		15.1	26	35.1		6.36	9.5	5.31	3.53	0.97	1.54	10.8	14.7	20.1										11.5	12.1	12.2	13.6	11.7	3.28	4.01	4.31	4.08	4.95
Th	1.33	1.2	1.24	1.72	1.51	1.43		2.98316	2.85251		1.41	0.721	0.843		1.59	2.65	1.52	0.63	0.85	0.8	2.65	2.32	1.99		3.92	3.53	2.02	1.88	1.56	2.07	3.82		1.6	1.76	0.9	1.03	1.12	1.02	0.94	0.94	0.98	1.3		1.93	1.03	0.56	0.39	0.97	1.93
U	0.612	0.697	0.824	0.443	0.704	0.394		1.09551	0.82393		0.301	0.247	0.246		0.37	0.63	0.37	0.17	0.2	0.2	0.63	0.94	0.55		2.19	0.61	0.87	0.15	0.29	0.58	0.46		0.48	0.4	0.25	0.27	0.25	0.29	0.26	0.29	0.27	0.35		0.48	0.25	0.34	0.23	0.77	0.42
Note that unpulished data of Yang (2016) were not shown here.
Chen, F.L., Cui, X.Z., Lin, S.F., Wang, J., Yang, X.M., Ren, G.M., and Pang, W.H., 2021, The 1.14 Ga mafic intrusions in the SW Yangtze Block, South China: Records of late Mesoproterozoic intraplate magmatism: Journal of Asian Earth Sciences, v. 205, p. 104603, https://doi.org/10.1016/j.jseaes.2020.104603.
Chen, W.T., Sun, W.H., Wang, W., Zhao, J.H., and Zhou, M.F., 2014, “Grenvillian” intra-plate mafic magmatism in the southwestern Yangtze Block SW China: Precambrian Research, v. 242, p. 138–153, http://dx.doi.org/10.1016/j.precamres.2013.12.019.
Greentree, M.R., Li, Z.X., Li, X.H., and Wu, H., 2006, Latest Mesoproterozoic to earliest Neoproterozoic basin record of the Sibao orogenesis in western South China and relationship to the assembly of Rodinia: Precambrian Research, v. 151, p. 79–100, https://doi.org/10.1016/j.precamres.2006.08.002.
Liu, G.C., Li, J., Qian, X., Feng, Q.L., Wang, W., Chen, G.Y., and Hu, S.B., 2021, Geochronological and geochemical constraints on the petrogenesis of late Mesoproterozoic mafic and granitic rocks in the southwestern Yangtze Block: Geoscience Frontiers, v. 12, p. 39–52, https://doi.org/10.1016/j.gsf.2020.07.005.
Yang, S.Q., 2016, Genetic relationship between Proterozoic mafic magmatism and Fe-Cu deposits from northeastern Yunnan Province, and its tectonic significance [Ph.D thesis]: Beijing, University of Chinese Academy of Sciences, 117 p.
Zhu, W.G., Zhong, H., Li, Z.X., Bai, Z.J., and Yang, Y.J., 2016, SIMS zircon U-Pb ages, geochemistry and Nd-Hf isotopes of ca. 1.0 Ga mafic dykes and volcanic rocks in the Huili area, SW China: origin and tectonic significance: Precambrian Research, v. 273, p. 67–89, http://dx.doi.org/10.1016/j.precamres.2015.12.011.
[truncated: 31 more columns]
